# 1 Title page

2 **Article title:** The interaction of phylogeny and community structure: linking clades' ecological structures  
3 and trait evolution

4 **Authors:** William D. Pearse<sup>1\*</sup>, Pierre Legendre<sup>2</sup>, Pedro Peres-Neto<sup>3</sup>, and T. Jonathan Davies<sup>4</sup>

5 <sup>1</sup> Department of Biology & Ecology Center, Utah State University, 5305 Old Main Hill, Logan UT, 84322.

6 ORCID: 0000-0002-6241-3164.

7 <sup>2</sup> Département de sciences biologiques, Université de Montréal, Montréal, QC, Canada.

8 <sup>3</sup> Department of Biology, Concordia University, 7141 Sherbrooke Street West Montreal, Quebec H4B

9 1R6, Canada. Quebec Center for Biodiversity Sciences, 205 Dr. Penfield Avenue, Montreal, QC, H3A

10 1B1, Canada

11 <sup>4</sup> Departments of Botany, and Forest & Conservation Sciences, University of British Columbia, BC,

12 Canada

13 \* To whom correspondence should be addressed: [will.pearse@usu.edu](mailto:will.pearse@usu.edu).

14 **Acknowledgements:** We are grateful to XXX anonymous reviewers, and the editorial board, for their help

15 improving this manuscript. TJD and the Davies lab are funded by Fonds de Recherche Nature et Tech-

16 nologies grant number 168004 and an NSERC Discovery Grant. WDP and the Pearse lab are funded by

17 NSF ABI-1759965, NSF EF-1802605, and USDA Forest Service agreement 18-CS-11046000-041.

18 **Biosketch:** All authors' research interests focus on the intersect between ecology, evolutionary biology,

19 and biostatistics. WDP focuses, in particular, on the use of phylogenies to infer how ecological assembly

20 and function operates, and the role of phylogenies in conservation prioritisation.

1 **Article title:** The interaction of phylogeny and community structure: linking clades' community compositions and  
2 trait evolution  
3 **Running title:** Clades' variation in community composition

## 4 **1 Abstract**

### 5 **Aim.**

6 Community phylogenetic studies use information about species' evolutionary relationships to understand the pro-  
7 cesses of community ecological assembly. A central premise of the field is that species' evolution maps onto ecological  
8 patterns, and phylogeny reveals something more than species' traits alone. We argue, therefore, that there is a need  
9 to better understand and model the interaction of phylogeny with species' traits and community composition.

### 10 **Innovation.**

11 We outline a new method that identifies clades with unusual ecological structures, based around partitioning the  
12 variation of species' site occupancies ( $\beta$ -diversity). Eco-phylogenetic theory would predict that these clades should  
13 also demonstrate distinct evolutionary trajectories. We suggest that modelling the evolution of independent trait  
14 data in these clades represents a strong test of whether there is an association between species' ecological structure  
15 and evolutionary history.

### 16 **Main conclusions.**

17 Using an empirical dataset of mammals from around the world, we identify two clades of rodents that tend not  
18 to co-occur (are phylogenetically overdispersed), and then find independent evidence of slower rates of body mass  
19 evolution in these clades. We suggest that our approach, which assumes nothing about the mode of species' trait  
20 evolution but rather seeks to explain it using ecological information, presents a new way to examine eco-phylogenetic  
21 structure.

22 **Keywords:** beta-diversity, trait evolution, mammals, phylogenetic scale, competition, environmental filtering

## 2 Introduction

Community phylogenetics (eco-phylogenetics) represents an attempt to link the evolutionary history of species to their present-day ecological interactions (Webb *et al.* 2002; Cavender-Bares *et al.* 2009). The field is young but controversial, and some of its fundamental assumptions have been criticised (notably by Mayfield & Levine 2010). Many community phylogenetic studies invoke niche conservatism (reviewed in Wiens *et al.* 2010) to assert that phylogenetic distance is a measure of distance in niche space, making phylogenetic structure a metric of ecological structure. However, few studies explicitly model such niche conservatism, and when a model is defined it is usually Brownian motion, which (arguably) describes neither niche conservatism (Losos 2008) nor similarity among distantly related species (emphasised by Godoy *et al.* 2014; Cadotte *et al.* 2017). Phylogeny is most often invoked as a proxy for unmeasured functional traits (as the ‘Phylogenetic Middleman’—Swenson (2013); see also Peres-Neto *et al.* (2012)). Such use undervalues phylogenetic relationships among species, which could be used to place (rather than approximate) species’ trait and distribution data within the context of past evolutionary and/or biogeographical processes that have shaped current patterns of species’ distributions and their co-occurrences. We cannot disentangle species’ functional trait evolution from their functional trait ecology if we use phylogeny as a measure of both. There is, therefore, a need to better integrate evolutionary history into community phylogenetics that parallels advances in the field of comparative analysis, where phylogeny is increasingly viewed as the inferential backbone for models of species’ trait evolution, not simply as a statistical correction (*e.g.*, Freckleton *et al.* 2011).

One of the earliest, and most commonly used, applications of community phylogenetic methods is to disentangle the impact of niche-based processes such as environmental filtering and competition on community assembly (Webb 2000; Cavender-Bares *et al.* 2006). Here, it is assumed that a community of closely-related species (phylogenetic clustering) reflects environmental filtering on the basis of phylogenetically conserved traits, while the converse (phylogenetic overdispersion) implies competitive exclusion (Webb *et al.* 2002). This direct mapping of phylogenetic structure onto ecological processes has been criticised (Cavender-Bares *et al.* 2009; Mayfield & Levine 2010), leading many to separately calculate the phylogenetic and functional trait structures of communities and then compare them (*e.g.*, Kraft & Ackerly 2010; Graham 2012). Critically, such comparisons do not capture the *interaction* between functional traits and phylogeny: how different ecological structures in different clades may have arisen. Multiple ecological and evolutionary processes interact to affect eco-phylogenetic structure, obscuring the signal of each process (Webb *et al.* 2002; Kraft *et al.* 2007; Cavender-Bares *et al.* 2009; Kembel 2009; Elliott *et al.* 2016). At its simplest, one clade may be functionally or phylogenetically overdispersed while another is clustered: only a clade-based approach can detect and unpick these conflicting signals. Figure 1 gives a conceptual example of how common ecological processes can produce variation among clades’ eco-phylogenetic structure. Using differences in ecological pattern among clades to guide questions about ecological assembly is a form of phylogenetic natural history (Uyeda *et al.* 2018).

It is already well-appreciated in the eco-phylogenetic literature that different clades might demonstrate conflicting

56 patterns, hinting at the interaction of ecological and phylogenetic structure (Ndiribe *et al.* 2013; Elliott *et al.* 2016).  
57 For example, the phylogenetic scale (*e.g.*, clades with different crown ages) of a study, and its relationship with spatial  
58 scale (*e.g.*, spatial extent) has itself become an object of study (see Swenson *et al.* 2006; Vamosi *et al.* 2009; Graham  
59 *et al.* 2018). Parra *et al.* (2010) were one of the first to examine the contribution of different clades to a single metric  
60 of phylogenetic structure. Later work expanded node-based analysis to consider the separate structures of individual  
61 clades (Pearse *et al.* 2013), and others have examined variation in environmental and biogeographic structure among  
62 clades (Leibold *et al.* 2010; Borregaard *et al.* 2014). Surprisingly, these advances in the measurement of clade-based  
63 eco-phylogenetic structure have been disconnected from clade-based advances in trait evolution (*e.g.*, Beaulieu *et al.*  
64 2012; Mazel *et al.* 2016) and phylogenetic diversification (*e.g.*, Rabosky 2014). This is despite early work linking the  
65 order of trait evolution to community composition (Ackerly *et al.* 2006; Silvertown *et al.* 2006).

66 We suggest that one central assertion of community phylogenetics is that the evolution of species' traits can be  
67 meaningfully linked to their present-day ecological structure (Webb *et al.* 2002; Cavender-Bares *et al.* 2009). A strong  
68 test of this assertion would be to link variation in the tempo or mode of trait evolution among clades with independent  
69 evidence of variation of community composition within those same clades. This goes beyond independently testing  
70 for phylogenetic structure of assemblages and traits (Swenson 2013): it tests hypotheses that specific clades should  
71 have different modes of trait evolution that cause, or are the consequence of, changes in the community composition  
72 of those clades (see figure 1). This approach looks to validate the assertion that variation among clades' ecological  
73 structure is a product of the interaction of phylogeny with ecology using independent trait data.

74 In this paper, we extend an existing  $\beta$ -diversity framework (Legendre & De Cáceres 2013) to identify the unique  
75 contribution of phylogenetic clades to variation in community composition. Thus the contributions of clades can be  
76 compared with those of species and sites. Using this method it is possible to detect clades whose species do and  
77 do not tend to co-occur ('clustered' and 'over-dispersed' clades; Webb *et al.* 2002), and thus detect and disentangle  
78 variation in ecological structure across the tree of life. We apply our method to global mammal data (Jones *et al.*  
79 2009; Thibault *et al.* 2011), where we find support for slower rates of body mass evolution in over-dispersed clades.  
80 By linking variation in clades' ecological structure to variation in clades' trait evolution, we show the power of  
81 phylogeny as data to help understand the evolution of ecological community assembly.

## 3 Methods

All software referred to below in *italics* are packages for the *R* environment (R Core Team 2017), and novel code written for this project is released in *pez* (in the function family *beta.part*; Pearse *et al.* 2015, to be added after acceptance, and currently in the supplementary materials). The supplementary materials contain code (that, using *suppdata*, also fetches all data; Pearse & Chamberlain 2018) that reproduces our empirical example in its entirety.

### 3.1 Overview and motivation

We often wish to determine whether species within an assemblage are more (phylogenetically *clustered*) or less (*overdispersed*) related compared to some expectation of assembly from a larger set of species, from which patterns we hope to infer some ecological mechanism. However, there is a growing understanding that such patterns are not necessarily uniform among the clades within a phylogeny (Leibold *et al.* 2010; Parra *et al.* 2010; Pearse *et al.* 2013; Borregaard *et al.* 2014). Indeed, phylogenetic clustering is an inherent property of *clades*: a phylogenetically clustered assemblage must have one or more over-represented clades, since clades are closely-related species and phylogenetic clustering is the presence of closely-related species. Below we describe how these patterns of clustering and overdispersion map onto clades within a phylogeny, using an extension of existing approaches to partition  $\beta$ -diversity (Legendre & De Cáceres 2013). By testing for differences in the evolution of such clades, we are able to test for associations between ecological and evolutionary processes, moving phylogeny from proxy for traits to data to be explored in the context of traits.

Figure 2 shows two assemblages ('A' and 'B') in an eight-species phylogeny; one of the clades is clustered, the other overdispersed. The general principle is clearer with species' presence ('1') and absence ('0') data, but the calculations are the same with species' abundances. While the variance ( $\sigma^2$ ) of each species' occupancy of the two sites is the same ( $1/2$ ), by summing the species' occupancies within each clade the variance increases in the clustered clade and decreases in the overdispersed clade. When compared with simulations that provide null expectations of the expected variance in different clades, it is therefore possible to locate significant clustered and overdispersed clades across a set of ecological assemblages. We note that the standard advice when calculating  $\beta$ -diversity of abundance data is to work with a transformed data matrix (typically a Hellinger transformation; Legendre & Gallagher 2001). We do not do so here for clarity, and note that our simulations indicate our method is robust to such untransformed data.

Once clades with different ecological structures have been identified, we can test whether the evolution of *independent* trait data differs within those clades (following Beaulieu *et al.* 2012). It is, of course, equally possible to test for variation in the evolution of clades first, and then to test the community composition of those clades using our  $\beta$ -diversity approach as the two procedures are performed independently. In such cases, clades with outliers in a PGLS regression (see Freckleton *et al.* 2011), or the output from methods such as SURFACE (Ingram & Mahler 2013),

113 bayou (Uyeda & Harmon 2014), or BMM (if shifts in speciation/extinction were of interest; Rabosky 2014) could be  
114 used to select candidate clades. Such clade-level tests directly map variation in ecological and evolutionary structure  
115 onto each other. Within this framework, phylogeny is not a mere proxy for missing species' trait data (Mace *et al.*  
116 2003; Srivastava *et al.* 2012; Swenson 2013): the interaction between phylogenetic, community composition, and trait  
117 data provides novel insight into how evolutionary history is linked with ongoing ecological processes.

118 We suggest that the main source of novelty in our approach is the comparison of trait evolution among clades with  
119 the ecological structure of clades. Additionally, our method of detecting variation among clades' ecological structure  
120 is also novel. While there exist various approaches for identifying clades with particular ecological structures, our  
121 method is distinct from them. Firstly, and most importantly, it is a method for detecting variation in clade-level  
122 compositions (*c.f.* Ives & Helmus 2011). Secondly, it compares multiple sites (*c.f.* Pearse *et al.* 2013) simultaneously  
123 as it measures  $\beta$ -diversity. Thirdly, it does not seek to find clades that contribute to an overall pattern (*c.g.* Parra  
124 *et al.* 2010) but rather identify contrasting patterns among clades. Finally, it models all species simultaneously and  
125 so does not compare species' individual drivers of presence/abundance, making it capable of detecting overdispersion  
126 (*c.f.* Leibold *et al.* 2010; Borregaard *et al.* 2014).

127 Because our clade-wise test of ecological structure is novel, so too are our definitions of overdispersion and clustering  
128 (*c.f.* Webb 2000; Webb *et al.* 2002; Cavender-Bares *et al.* 2009). Here we define a clustered clade not on the sole  
129 basis of presences within a single site, but rather the pattern of presences and *absences* across *multiple* sites. For  
130 example, the clustered clade in figure 2 would not traditionally have been considered clustered in site B. Further, we  
131 emphasise that, in our framework every clade has a variance, and while we present “clustered” and “overdispersed”  
132 clades in figure 2, it is likely that many clades fall somewhere between these two extremes.

### 133 3.2 Extensions of $\beta$ -diversity and significance tests

134 The method of Legendre & De Cáceres (2013) is essentially based around variance in species' abundances across  
135 sites. In this context, our  $\beta$ -diversity partitioning extends species-level contributions to consider clade contributions.  
136 This allows ecologists interested in comparing the contributions of species and sites to  $\beta$ -diversity patterns to also  
137 compare the contributions of clades. Indeed, while we focus solely on phylogenetic clades in this manuscript, we see  
138 no reason why this approach could not be applied to other (hierarchical) groups of species, such as those produced  
139 using functional traits (Petchey & Gaston 2006).

140 We suggest two ways to assess the significance of a clade's departure from the expected variance (the clade-level  
141 variances,  $\sigma^2$ , on figure 2). The first is an ‘exact’ method based on the expectation of variances, and is described  
142 in the Supplementary Materials. The second method is based on the contrast of observed clade variances with  
143 null distributions of variances estimated via permutation (*e.g.*, reshuffling species' identities across the phylogeny,  
144 reviewed in Gotelli 2000). Ranking a clade's observed variance among its null variances would reveal whether a

145 clade had unusually high or low variance. The null model approach protects against cases in which a clade whose  
146 members are entirely absent or omnipresent within a set of communities from being highlighted as a clade with low  
147 variance. We strongly recommend the use of ecological null models to assess significance as they allow more flexibility  
148 over the processes contained with a null hypothesis, and are not as reliant on the statistical distribution of species'  
149 abundances.

### 150 3.3 Simulations testing clade-partitioning

151 We used simulations to verify our method's ability to detect variation in ecological structure among clades. Below we  
152 describe each parameter of the simulation, listing each parameter in *italics* and its values across the simulations (in  
153 parentheses). We simulated phylogenies of  $n_{spp}$  species (either 50 or 100) following a pure-birth Yule process (using  
154 *geiger v. 2*; Pennell *et al.* 2014). We then selected a focal clade containing either 5–10% or 10–20% of the species in  
155 the phylogeny, and simulated a trait under Brownian motion (root set to 0, also using *geiger v. 2*; Pennell *et al.*  
156 2014) across the entire phylogeny with a  $\sigma^2$  (0.5, 1, 1.5, 2, 2.5;  $\sigma_{tree}^2$ ), excluding the focal clade, which had a  $\sigma^2$  a  
157 multiple of 10 greater or lesser than across the entire tree ( $\times 10^{-3}, 10^{-2.75}, 10^{-2.5}, \dots, 10^3; \sigma_{clade}^2$ ). We then simulated  
158 community assembly across  $n_{site}$  sites (either 50 or 100) on the basis of this simulated trait: in each site we randomly  
159 selected a species and randomly drew species to be members of that community on the basis of their trait distance  
160 from that species. Thus species with absolute differences in simulated traits  $\geq 1$  from the focal species would have a  
161 probability of membership of 0; a species with a difference of  $|0.5|$  would have a probability of 0.5. We acknowledge  
162 that this mapping between trait difference and probability of co-occurrence is arbitrary and was chosen for the sake  
163 of simplicity. In related simulations, however, we have seen little evidence that this qualitatively affects our method's  
164 performance.

165 These simulations represent a form of ecological assembly that is deliberately agnostic with regard to any particular  
166 ecological mechanism (*e.g.*, facilitation, competition, or environmental filtering), but conceptually similar to that  
167 shown in figure 1. It is well-known that multiple ecological mechanisms can result in the same eco-phylogenetic  
168 structure (Cavender-Bares *et al.* 2009; Mayfield & Levine 2010). Here we simply aim to simulate variation and then  
169 test our power to detect that variation, given pattern detection is an important aid in determining the processes  
170 underlying community assembly. A clade can evolve faster than the rest of the phylogeny ( $\sigma_{clade}^2 > \sigma_{tree}^2$ ), in which  
171 case we would expect close-relatives to rarely co-occur within a clade (an overdispersed clade; see figure 2). A clade  
172 can also evolve slower than the rest of the phylogeny ( $\sigma_{clade}^2 < \sigma_{tree}^2$ ), in which case we would expect close-relatives  
173 to frequently co-occur (a clustered clade; see figure 2). Even in simulations where  $\sigma_{clade}^2 = \sigma_{tree}^2$ , we still evolved a  
174 separate trait for the focal clade, making this an extremely conservative test of our method.

175 We repeated this simulation approach for all combinations of our parameter values, and an additional 20 times for each  
176 combination with identical  $\sigma_{tree}^2$  and  $\sigma_{clade}^2$ , resulting in a total of 2160 simulations. For each simulation, we ranked

177 the observed variance of the focal clade within 99 randomisations (the observed value was included as part of the null  
178 distribution, totaling 100 values for each null distribution), swapping species' identities on the phylogeny and keeping  
179 everything else constant. These rankings provide probabilities under the null hypothesis: values greater than 0.975  
180 suggest clustering (at  $\alpha_{5\%}$ ) and values lesser than 0.025 suggest overdispersion. This provides a test of whether our  
181 method can reliably detect overdispersion (ranked the lowest or second-lowest variance in the randomisations when  
182  $\sigma_{clade}^2 < \sigma_{tree}^2$ ), clustering (ranked the highest or second-highest variance in the randomisations when  $\sigma_{clade}^2 < \sigma_{tree}^2$ ),  
183 and whether it is vulnerable to false-positives (*i.e.*, type I error rates greater than the expected confidence level at  
184 0.05—ranking consistent with clustering or overdispersion when  $\sigma_{clade}^2 = \sigma_{tree}^2$ ). Note that clades are hierarchically  
185 nested within each other, and so species that are shared across clades mean clades' structure are not necessarily  
186 independent. While we make reference to this in the discussion, we do not conduct simulations to investigate this  
187 further, as it is a feature that has been discussed at length in the literature (*e.g.*, Alfaro *et al.* 2009). We draw the  
188 reader's attention to the fact that we conduct these simulations over a range of parameter values, with the explicit  
189 aim of finding the conditions under which our method performs well and where it underperforms.

### 190 **3.4 Empirical example: global rodent communities**

191 To provide an empirical example of how our approach uses ecological structure to generate specific hypotheses about  
192 the evolution of species' traits, we present an analysis of a global rodent dataset. We took data from a global mammal  
193 community dataset (Thibault *et al.* 2011), global phylogeny (Bininda-Emonds *et al.* (2007), updated by Fritz *et al.*  
194 (2009)), and body mass from a large database for mammal traits (Jones *et al.* 2009). This global community dataset  
195 covers a number of continents and community types, and body mass is known to be a good proxy for ecological  
196 interactions in rodents (see Thibault *et al.* 2011). Excluding all species not covered in all three datasets left us with  
197 abundance information for 483 species across 939 sites (assemblages) worldwide. Following the method described  
198 above, we identified clades'  $\beta$ -diversity and assessed statistical significance by comparison to 1000 independent-swap  
199 randomisations (Gotelli 2000; Kembel *et al.* 2010).

200 Identifying clades with unusual  $\beta$ -diversity does not, however, test whether there is an association between the  
201 evolution of a clade and its ecological structure. We therefore fitted Brownian motion and Ornstein-Uhlenbeck (OU)  
202 models using *OUwie* (Beaulieu *et al.* 2012) to the (log-transformed) body mass data, contrasting models with shared  
203 and varying parameters for clades identified as significantly departing from our null expectations in our  $\beta$ -diversity  
204 approach. Support for Brownian and OU models with different parameters for the clades identified by the  $\beta$ -diversity  
205 ecological analysis would suggest a link between ecological structure and trait evolution. Where hierarchically-nested  
206 clades were identified, we selected the oldest clade as this is more conservative (the 'cascade' problem; see Discussion)  
207 and parameter estimation is more accurate in larger clades (Beaulieu *et al.* 2012). In the Supplementary Materials,  
208 we present results of a series of permutation tests we performed to ensure that our evolutionary model-fitting was



209 not biased towards finding support for particular evolutionary hypotheses.

## 210 4 Results

211 Results from our simulations are presented in table 1 and figure 3, and show that our method powerfully and reliably  
212 detects variation in phylogenetic structure among clades. Our method has strong statistical power to detect clustering  
213 (higher variance within a clade; the red line in figure 3), and a somewhat reduced power to detect overdispersion  
214 (lower variance within a clade; the blue line in 3). As shown in table 1, however, greater sampling modifies this:  
215 sampling 100 species across 100 sites additively increases the ranking of the observed variance by 10% (*e.g.*, from  
216  $p = 0.85$  to  $p = 0.95$ ) in comparison with 50 species across 50 sites. Our method shows a tendency to spuriously  
217 suggest support for clustering (*i.e.*, overall inflated type I error rates in simulations of 24% at two-tailed  $\alpha_{5\%}$ ; see  
218 figure 3), but again this varies depending on the biological context. As shown in table 1, focal clades that make  
219 up large proportions of the total data are more likely to be erroneously identified as clustered: if the focal clade  
220 contains 10 of the 100 species in a system ( $n_{sites} = 50$ ,  $\sigma^2=1$ ) the predicted probability of clustering is 0.77, but  
221 if the clade contains 20 species (*i.e.*, 20% of the species) that prediction rises to 0.95. Neither of these predicted  
222 values are statistically significant at  $\alpha_{5\%}$ . As we highlighted above, we conducted simulations across a wide region  
223 of parameter space to highlight where our method performs well and where it performs poorly. Thus the raw results  
224 plotted in figure 3 do not necessarily reflect our average expectations for performance of our method.

225 From our analyses of the rodent dataset, figure 4 shows the mammal clades identified as having significantly different  
226 variance distributions, and table 2 shows the AIC comparison of models of trait evolution that incorporate variation  
227 within those clades. The two clades on which we focused (marked on figure 4) are the *Scuridae* (squirrels) and their  
228 sister family the *Gliridae* (dormice), and the *Echimyidae* (a Neotropical rodent family) and some close-relatives within  
229 what is sometimes called the *Caviomorpha* (*e.g.*, South American rodents like the guinea pig). We refer to these two  
230 groups as the ‘squirrels’ and ‘cavis’, respectively, although these terms do not precisely map onto all species within the  
231 clades. The squirrel and the cavi clades were both identified as having low variance (phylogenetic overdispersion).  
232 Note that our method also detected clades indicative of clustering (high variance). As the low-variance clades  
233 are nested within these high-variance clades, we suggest they might reflect important eco-evolutionary shifts. The  
234 detection of both phylogenetic clustering and overdispersion demonstrates the ability of our method to reveal both  
235 kinds of pattern in empirical datasets.

236 Table 2 shows that the squirrel and cavis clades were also characterised by different rates of trait evolution. The  
237 top four models, with  $\delta AIC$  less than 5, all supported different rates of body mass evolution for these two clades.  
238 The fifth-best model had a  $\delta AIC$  of 14.9 and so there is only limited support (Burnham & Anderson 2002) for  
239 the alternative hypothesis that trait evolution is constant across the squirrels, cavis, and the rest of the mammal  
240 phylogeny. The lowest-AIC model favoured a simple three-rate Brownian motion model in which the rate of body  
241 mass evolution in squirrel and cavi clades is significantly slower, most notably in the squirrel clade. Our permutations  
242 procedure suggest that, by chance, we would expect to find the *opposite* pattern to that found with the empirical

<sup>243</sup> data (see Supplemental Materials), giving greater strength to our findings.

## 244 5 Discussion

245 We have presented a novel method for identifying clades (groups) of species whose ecological community structure  
246 differs from other species across a set of communities. Simulating species' phylogenies and responses to an environ-  
247 mental gradient, we demonstrated that the method reliably detects shifts in the variance of species' abundances,  
248 identifying different phylogenetic structures. Most importantly, however, we have also shown, using empirical data,  
249 that the tempo of trait evolution shifts within clades associated with unusual present-day ecological structure. To  
250 the best of our knowledge, this is the first eco-phylogenetic framework that performs hypothesis tests of associations  
251 between the evolution and ecological community composition of clades. By linking variation among clades' ecological  
252 structure with independent evidence for variation in those clades' rates of trait evolution, we have found evidence for  
253 an interaction between evolutionary and ecological information. We argue that our approach, combining evidence of  
254 both ecological and evolutionary patterns, has more power to answer questions about the underlying eco-evolutionary  
255 drivers of community assembly than methods focusing singularly on phylogenetic or trait data alone.

### 256 5.1 $\beta$ -diversity partitioning in community phylogenetics

257 The use of phylogeny as a proxy for ecological process has been criticised. It has been argued that there is little need  
258 for phylogeny if we already have functional traits (Swenson 2013), and phylogenetic pattern rarely maps directly  
259 onto ecological process (a critique that applies equally to functional traits; Mayfield & Levine 2010). However, we  
260 have suggested one central premise of community phylogenetics is that there is an association between the evolution  
261 of species' traits and the phylogenetic structure of the communities in which they are found. Many community  
262 phylogenetic studies, like ours, examine the tempo and mode of trait evolution within their system (*e.g.*, Swenson *et al.*  
263 *al.* 2006; Kraft *et al.* 2007), but few have asked how trait evolution and community phylogenetic structure are linked  
264 and feedback into each other. Simple measures of phylogenetic signal assume complete, or at least unbiased, taxon  
265 sampling (Pagel 1999; Blomberg *et al.* 2003), and so eco-phylogenetic structure, which, by definition, implies non-  
266 random taxonomic representation, may mask broader (true) patterns of trait evolution by introducing non-random  
267 taxonomic sampling. Our approach offers a coherent framework to test for links between the macro-evolutionary  
268 dynamics of clades and their present-day (or relatively recent past) community composition.

269 Despite conceptual issues, the utility of phylogeny in predicting species' traits (Guénard *et al.* 2013), Janzen-Connell  
270 effects (Gilbert & Webb 2007), invasion success (Strauss *et al.* 2006), and ecosystem function (Cadotte *et al.* 2013)  
271 suggests phylogeny will remain a useful (Tucker *et al.* 2018), if imperfect (Cadotte *et al.* 2017), proxy in ecology for  
272 some time. Yet we suggest that phylogeny is more than just a surrogate for unmeasured traits, and that it provides us  
273 with the ability to link patterns and processes in ecology and evolution. Here, we map patterns in separate ecological  
274 assemblages and species trait datasets onto each other, linking them by treating phylogeny in and of itself as data in

275 two separate analyses. Our approach does not invoke niche conservatism, but rather seeks to understand how traits  
276 have evolved and match with (current) patterns of species co-occurrences across local communities. As such, there is  
277 no requirement that closely related species are more ecologically similar or compete more strongly, assumptions that  
278 have been heavily criticised (Cahill *et al.* 2008; Mayfield & Levine 2010). Our results simply support a link between  
279 the ecological structure ( $\beta$ -diversity) of clades and the evolutionary history of those clades. The evolutionary patterns  
280 we observe come from interactions, or the absence of interactions, that occurred over millions of years, potentially  
281 in assemblages very different to those we see today. Our analyses indicate that these past interactions have left an  
282 imprint on present-day ecological structure, and imply that future evolutionary trajectories may be influenced by  
283 present-day species interactions.

284 In our analysis of small mammal assemblages, we showed that the ‘capi’ and ‘squirrel’ clades, whose members tended  
285 not to co-exist (their clade variances were low), have lower rates of character evolution (table 2). Rodent body size  
286 is a driver of ecological competition (Bowers & Brown 1982; Ernest 2005), and our results suggest slower evolution  
287 of body size is a driver of variation in the present-day community composition of our small-mammal communities.  
288 The clades we have focused on are relatively small and young (see figure 4), and previous work (Ackerly *et al.* 2006;  
289 Silvertown *et al.* 2006) has suggested that traits that evolve early and late in the evolutionary history of a clade may  
290 affect ecological assembly differently. Our results imply that it is not just the timing of body size evolution that  
291 may be important, but also its rate of evolution. We do not yet know what caused this slow-down in the ‘capi’ and  
292 ‘squirrel’ clades and whether these associations are driven by changes in diversification rate (which can be confounded  
293 with trait evolution; FitzJohn 2010). There is, however, some evidence that younger clades tend to co-occur more  
294 than older ones (Pearse *et al.* 2013; Parmentier *et al.* 2014).

## 295 5.2 Method performance

296 We show that our method has good statistical power, and compares favourably to the widely used NRI and NTI  
297 metrics of phylogenetic community structure, for which statistical power has been estimated at less than or equal  
298 to 20% (Kraft *et al.* 2007) and 60% (Kembel 2009). In some cases, however, we observed inflated type I error rates  
299 relative to these other methods (see below for discussion). In many ways these are unfair comparisons, given that our  
300 approach makes use of information from multiple sites (although the number of species with phylogenetic structure  
301 is comparable), which we would argue this is a strength of our method. Phylogenetic Generalised Linear Mixed  
302 Models (Ives & Helmus 2011) also use many sites at once, and our results compare favourably to this approach  
303 (87% detection rate for phylogenetic clustering, 53% for overdispersion, but with fewer sites than in our study). It  
304 is important to note, however, that these alternative methods are intended to answer different questions. We make  
305 these comparisons simply to demonstrate that our approach performs reasonably in comparison with others, even in  
306 simulations where the number of species in a focal clade could be as low as 5 and the datasets themselves are small

307 (no more than 100 species or sites).

308 Our simulations show that, in cases where the focal clade makes up a large proportion of the species under study  
309 (in our simulations, over 20%) type I error rates could be inflated. We do not feel that this is of concern, for  
310 several reasons. First, within our framework, clades must be detected as significant both in terms of their ecological  
311 structure and also their historic trait evolution. As such spurious identification of structured clades would tend to  
312 weaken any association between their ecology and evolution. Second, it is rare that ecological assemblages are truly  
313 randomly structured: the norm is for them to display some degree of phylogenetic structure (Vamosi *et al.* 2009).  
314 We suggest most biologists may be more interested in detecting the difference between overdispersion and clustering,  
315 not overdispersion/clustering versus random assembly. This is the case in our empirical example, where we examined  
316 clades that were overdispersed whose sisters are clustered. Third, we used two separately evolved traits for the tree  
317 and the focal clade. Our method may be detecting genuine differences between the focal clade and the tree as a  
318 result of different ecological assembly on the basis of genuinely different traits. We also note that type II error rates  
319 have been shown to be even higher for other, more commonly used, metrics of phylogenetic structure. For example,  
320  $SES_{MPD}$  and  $SES_{MNTD}$ , when estimated by taxa-shuffling null distributions such as we employ here, can have  
321 type I error rates of *c.* 50% (Kembel 2009).

### 322 5.3 Potential methodological extensions

323 Like similar approaches (Parra *et al.* 2010; Pearse *et al.* 2013; Borregaard *et al.* 2014), does not directly consider  
324 nestedness (Ulrich *et al.* 2009), where the significance of a clade ‘cascades’ up into higher super-sets of hierarchical  
325 groupings (*c.f.* the ‘trickle-down’ problem in diversification analysis; Purvis *et al.* 1995; Moore *et al.* 2004). One  
326 possible extension would be to compare each clade with the *summed* clades subtending it (not, as in the method  
327 we present, the species within it). Thus each clade in a fully resolved phylogeny would have its variance compared  
328 with the variances of the two clades subtending it (our supplementary code permits this). Significance could be  
329 tested through null permutation, as we use in this manuscript, or potentially through nested ANOVAs. However,  
330 we suggest that this cascading is not so much a limitation but rather a matter of interpretation; that a group has  
331 unusual  $\beta$ -diversity because it contains other unusual groups does not strike us as problematic. A balanced approach  
332 could limit the study to particular clades on the basis of age or other *a priori* interest, or to hold problematic clades  
333 constant in null randomisations.

334 We also note that our approach for identifying ecologically structured clades does not incorporate phylogenetic  
335 branch lengths. Branch lengths inform models of trait evolution, and so for our purposes of mapping *independent*  
336 evolutionary structure onto ecological structure we consider it undesirable to have branch lengths play a role in both  
337 aspects. For those interested in incorporating branch lengths in other situations, a simple approach would be to  
338 multiply each species’ abundance by its evolutionary distinctiveness (Isaac *et al.* 2007) or another measure of its

339 phylogenetic uniqueness (*e.g.*, Redding & Mooers 2006; Cadotte *et al.* 2010). However, depending on the question  
340 at hand this might ‘average out’ the signal that we may be interested in detecting. For example, if community  
341 composition varies with phylogenetic scale (Webb *et al.* 2002; Cavender-Bares *et al.* 2009; Vamosi *et al.* 2009), it  
342 might be better to model the standard effect size (SES; *sensu* Kembel 2009) of node variance as a function of node  
343 age (see Pearse *et al.* 2013).

## 344 5.4 Conclusion

345 We suggest that the identification of clades with unusual ecological structure is of at least as much interest as the  
346 summary statistics that have been used frequently to describe phylogenetic assemblage structure but which map  
347 only poorly to ecological process. Further, we see that establishing links between assemblage structure and the  
348 evolution of species’ traits as a central premise of community phylogenetics, but has been rarely tested. As a field,  
349 community phylogenetics is well-placed to take advantage of recent advances in trait evolution (Pennell & Harmon  
350 2013; Nuismer & Harmon 2015) and eco-phylogenetic theory (Pigot & Etienne 2015). We have outlined here an  
351 approach to directly test links between the ecological structure of assemblages and the evolution of species’ traits. As  
352 we gain a firmer grasp of assemblages’ phylogenetic structure, we can begin to model it as data, not merely measure  
353 its pattern.

## Bibliography

- 355 Ackerly, D D, D W Schwilk, & C O Webb (2006). Niche evolution and adaptive radiation: testing the order of trait  
356 divergence. *Ecology* 87, S50–S61.
- 357 Alfaro, Michael E *et al.* (2009). Nine exceptional radiations plus high turnover explain species diversity in jawed  
358 vertebrates. *Proceedings of the National Academy of Sciences* 106 (32), 13410–13414.
- 359 Beaulieu, Jeremy M *et al.* (2012). Modeling stabilizing selection: expanding the Ornstein–Uhlenbeck model of adaptive  
360 evolution. *Evolution* 66 (8), 2369–2383.
- 361 Bininda-Emonds, Olaf R P *et al.* (2007). The delayed rise of present-day mammals. *Nature* 446 (7135), 507–12.
- 362 Blomberg, Simon P, Theodore Garland, & Anthony R Ives (2003). Testing for phylogenetic signal in comparative  
363 data: behavioral traits are more labile. *Evolution* 57 (4), 717–45.
- 364 Borregaard, Michael K *et al.* (2014). Node-based analysis of species distributions. *Methods in Ecology and Evolution*  
365 5 (11), 1225–1235.
- 366 Bowers, Michael A & James H Brown (1982). Body Size and Coexistence in Desert Rodents: Chance or Community  
367 Structure? *Ecology*, 391–400.
- 368 Burnham, K. P. & D. R. Anderson (2002). Model selection and multimodel inference: a practical information-theoretic  
369 approach. 2nd. Springer-Verlag.
- 370 Cadotte, Marc W. *et al.* (2010). Phylogenetic diversity metrics for ecological communities: integrating species richness,  
371 abundance and evolutionary history. *Ecology Letters* 13 (1), 96–105.
- 372 Cadotte, Marc W, T Jonathan Davies, & Pedro R Peres-Neto (2017). Why phylogenies do not always predict  
373 ecological differences. *Ecological Monographs* 87 (4), 535–551.
- 374 Cadotte, Marc, Cecile H. Albert, & Steve C. Walker (2013). The ecology of differences: assessing community assembly  
375 with trait and evolutionary distances. *Ecology Letters* 16, 1234–1244.
- 376 Cahill, James F. *et al.* (2008). Does phylogenetic relatedness influence the strength of competition among vascular  
377 plants? *Perspectives in Plant Ecology, Evolution and Systematics* 10 (1), 41–50.
- 378 Cavender-Bares, J., A. Keen, & B. Miles (2006). Phylogenetic structure of Floridian plant communities depends on  
379 taxonomic and spatial scale. *Ecology* 87 (7), S109–S122.



- 380 Cavender-Bares, Jeannine *et al.* (2009). The merging of community ecology and phylogenetic biology. *Ecology Letters*  
381 12, 693–715.
- 382 Chesson, P (2000). Mechanisms of maintenance of species diversity. *Annual Review of Ecology and Systematics* 31,  
383 343.
- 384 Elliott, Tammy L, Marcia J Waterway, & T Jonathan Davies (2016). Contrasting lineage-specific patterns conceal  
385 community phylogenetic structure in larger clades. *Journal of Vegetation Science* 27 (1), 69–79.
- 386 Ernest, SK (2005). Body size, energy use, and community structure of small mammals. *Ecology* 86 (6), 1407–1413.
- 387 FitzJohn, Richard G. (2010). Quantitative Traits and Diversification. *Systematic Biology* 59 (6), 619–633.
- 388 Freckleton, Rob P., Natalie Cooper, & Walter Jetz (2011). Comparative methods as a statistical fix: the dangers of  
389 ignoring an evolutionary model. *The American Naturalist* 178 (1), E10–E17.
- 390 Fritz, Susanne A, Olaf RP Bininda-Emonds, & Andy Purvis (2009). Geographical variation in predictors of mam-  
391 malian extinction risk: big is bad, but only in the tropics. *Ecology Letters* 12 (6), 538–549.
- 392 Gilbert, Gregory S. & Campbell O. Webb (2007). Phylogenetic signal in plant pathogen–host range. *Proceedings of*  
393 *the National Academy of Sciences* 104 (12), 4979–4983.
- 394 Godoy, Oscar, Nathan JB Kraft, & Jonathan M Levine (2014). Phylogenetic relatedness and the determinants of  
395 competitive outcomes. *Ecology Letters* 17 (7), 836–844.
- 396 Gotelli, Nicholas J. (2000). Null model analysis of species co-occurrence patterns. *Ecology* 81 (9), 2606–2621.
- 397 Graham, C H (2012). Untangling the influence of ecological and evolutionary factors on trait variation across hum-  
398 mingbird assemblages. *Ecology* 93, S99–S111.
- 399 Graham, Catherine H, David Storch, & Antonin Machac (2018). Phylogenetic scale in ecology and evolution. *Global*  
400 *Ecology and Biogeography* 27 (2), 175–187.
- 401 Guénard, Guillaume, Pierre Legendre, & Pedro Peres-Neto (2013). Phylogenetic eigenvector maps: a framework to  
402 model and predict species traits. *Methods in Ecology and Evolution* 4 (12), 1120–1131.
- 403 Ingram, Travis & D Luke Mahler (2013). SURFACE: detecting convergent evolution from comparative data by fitting  
404 Ornstein-Uhlenbeck models with stepwise Akaike Information Criterion. *Methods in Ecology and Evolution* 4 (5),  
405 416–425.
- 406 Isaac, Nick J B *et al.* (2007). Mammals on the EDGE: conservation priorities based on threat and phylogeny. *PLoS*  
407 *ONE* 2 (3), e296.
- 408 Ives, Anthony R. & Matthew R. Helmus (2011). Generalized linear mixed models for phylogenetic analyses of com-  
409 munity structure. *Ecological Monographs* 81 (3), 511–525.
- 410 Jones, Kate E *et al.* (2009). PanTHERIA: a species-level database of life history, ecology, and geography of extant  
411 and recently extinct mammals: Ecological Archives E090-184. *Ecology* 90 (9), 2648–2648.
- 412 Kembel, Steven W (2009). Disentangling niche and neutral influences on community assembly: assessing the perfor-  
413 mance of community phylogenetic structure tests. *Ecology Letters* 12 (9), 949–60.

- 414 Kembel, Steven W. *et al.* (2010). Picante: R tools for integrating phylogenies and ecology. *Bioinformatics* 26 (11),  
415 1463–1464.
- 416 Kraft, N J B *et al.* (2007). Trait evolution, community assembly, and the phylogenetic structure of ecological com-  
417 munities. *American Naturalist* 170 (2), 271–283.
- 418 Kraft, Nathan J. B. & David D. Ackerly (2010). Functional trait and phylogenetic tests of community assembly  
419 across spatial scales in an Amazonian forest. *Ecological Monographs* 80 (3), 401–422.
- 420 Legendre, Pierre & Miquel De Cáceres (2013). Beta diversity as the variance of community data: dissimilarity  
421 coefficients and partitioning. *Ecology Letters* 16 (8), 951–963.
- 422 Legendre, Pierre & Eugene D Gallagher (2001). Ecologically meaningful transformations for ordination of species  
423 data. *Oecologia* 129 (2), 271–280.
- 424 Leibold, Mathew A., Evan P. Economo, & Pedro Peres-Neto (2010). Metacommunity phylogenetics: separating the  
425 roles of environmental filters and historical biogeography. *Ecology Letters* 13 (10), 1290–1299.
- 426 Losos, Jonathan B (2008). Phylogenetic niche conservatism, phylogenetic signal and the relationship between phylo-  
427 genetic relatedness and ecological similarity among species. *Ecology Letters* 11 (10), 995–1003.
- 428 Mace, Georgina M, John L Gittleman, & Andy Purvis (2003). Preserving the tree of life. *Science* 300 (5626), 1707–  
429 1709.
- 430 Mayfield, Margaret M. & Jonathan M. Levine (2010). Opposing effects of competitive exclusion on the phylogenetic  
431 structure of communities. *Ecology Letters* 13 (9), 1085–1093.
- 432 Mazel, Florent *et al.* (2016). Improving phylogenetic regression under complex evolutionary models. *Ecology* 97 (2),  
433 286–293.
- 434 Moore, Brian R, Kai MA Chan, & Michael J Donoghue (2004). Detecting diversification rate variation in supertrees.  
435 *Phylogenetic Supertrees*. Springer, pp. 487–533.
- 436 Ndiribe, Charlotte *et al.* (2013). Phylogenetic plant community structure along elevation is lineage specific. *Ecology*  
437 *and evolution* 3 (15), 4925–4939.
- 438 Nuismer, Scott L & Luke J Harmon (2015). Predicting rates of interspecific interaction from phylogenetic trees.  
439 *Ecology Letters* 18 (1), 17–27.
- 440 Pagel, Mark (1999). Inferring the historical patterns of biological evolution. *Nature* 401 (6756), 877–884.
- 441 Parmentier, Ingrid *et al.* (2014). Prevalence of phylogenetic clustering at multiple scales in an African rain forest tree  
442 community. *Journal of ecology* 102 (4), 1008–1016.
- 443 Parra, Juan L., Jimmy A. McGuire, & Catherine H. Graham (2010). Incorporating clade identity in analyses of  
444 phylogenetic community structure: an example with hummingbirds. *The American Naturalist* 176 (5), 573–587.
- 445 Pearse, William D. & Scott A. Chamberlain (2018). Suppdata: Downloading Supplementary Data from Published  
446 Manuscripts. *Journal of Open Source Software* 3 (25), 721.

- 447 Pearse, William D. *et al.* (2015). pez: phylogenetics for the environmental sciences. *Bioinformatics* 31 (17), 2888–  
448 2890.
- 449 Pearse, William David, Andy Jones, & Andy Purvis (2013). Barro Colorado Island’s phylogenetic assemblage struc-  
450 ture across fine spatial scales and among clades of different ages. *Ecology* 94 (12), 2861–2872.
- 451 Pennell, Matthew W. & Luke J. Harmon (2013). An integrative view of phylogenetic comparative methods: connec-  
452 tions to population genetics, community ecology, and paleobiology. *Annals of the New York Academy of Sciences*  
453 1289 (1), 90–105.
- 454 Pennell, Matthew W. *et al.* (2014). geiger v2.0: an expanded suite of methods for fitting macroevolutionary models  
455 to phylogenetic trees. *Bioinformatics* 30 (15), 2216–2218.
- 456 Peres-Neto, Pedro R., Mathew A. Leibold, & Stéphane Dray (2012). Assessing the effects of spatial contingency and  
457 environmental filtering on metacommunity phylogenetics. *Ecology* 93, S14–S30.
- 458 Petchey, Owen L & Kevin J Gaston (2006). Functional diversity: back to basics and looking forward. *Ecology letters*  
459 9 (6), 741–758.
- 460 Pigot, Alex L & Rampal S Etienne (2015). A new dynamic null model for phylogenetic community structure. *Ecology*  
461 *Letters* 18 (2), 153–163.
- 462 Purvis, Andy, Sean Nee, & Paul H Harvey (1995). Macroevolutionary inferences from primate phylogeny. *Proceedings*  
463 *of the Royal Society of London B: Biological Sciences* 260 (1359), 329–333.
- 464 R Core Team (2017). R: A Language and Environment for Statistical Computing. R Foundation for Statistical  
465 Computing. Vienna, Austria.
- 466 Rabosky, Daniel L. (2014). Automatic detection of key innovations, rate shifts, and diversity-dependence on phylo-  
467 genetic trees. *PLoS ONE* 9 (2), e89543.
- 468 Redding, David W. & Arne Ø. Mooers (2006). Incorporating evolutionary measures into conservation prioritization.  
469 *Conservation Biology* 20 (6), 1670–1678.
- 470 Revell, Liam J (2012). phytools: an R package for phylogenetic comparative biology (and other things). *Methods in*  
471 *Ecology and Evolution* 3 (2), 217–223.
- 472 Silvertown, Jonathan *et al.* (2006). Phylogeny and the hierarchical organization of plant diversity. *Ecology* 87 (7),  
473 S39–S166.
- 474 Srivastava, Diane S. *et al.* (2012). Phylogenetic diversity and the functioning of ecosystems. *Ecology Letters* 15 (7),  
475 637–648.
- 476 Strauss, Sharon Y, Campbell O Webb, & Nicolas Salamin (2006). Exotic taxa less related to native species are more  
477 invasive. *Proceedings of the National Academy of Sciences* 103 (15), 5841–5845.
- 478 Swenson, Nathan G. (2013). The assembly of tropical tree communities—the advances and shortcomings of phylo-  
479 genetic and functional trait analyses. *Ecography* 36 (3), 264–276.

- 480 Swenson, Nathan G *et al.* (2006). The problem and promise of scale dependency in community phylogenetics. *Ecology*  
481 87 (10), 2418–2424.
- 482 Thibault, Katherine M *et al.* (2011). Species composition and abundance of mammalian communities. *Ecology* 92 (12),  
483 2316–2316.
- 484 Tucker, Caroline M *et al.* (2018). On the relationship between phylogenetic diversity and trait diversity. *Ecology*.
- 485 Ulrich, W., M. Almeida-Neto, & N.J. Gotelli (2009). A consumer's guide to nestedness analysis. *Oikos* 118 (1), 3–17.
- 486 Uyeda, Josef C & Luke J Harmon (2014). A novel Bayesian method for inferring and interpreting the dynamics of  
487 adaptive landscapes from phylogenetic comparative data. *Systematic Biology* 63 (6), 902–918.
- 488 Uyeda, Josef C, Rosana Zenil-Ferguson, & Matthew W Pennell (2018). Rethinking phylogenetic comparative methods.  
489 *Systematic Biology*, syy031.
- 490 Vamosi, S. *et al.* (2009). Emerging patterns in the comparative analysis of phylogenetic community structure. *Molec-*  
491 *ular Ecology* 18 (4), 572–592.
- 492 Webb, Campbell O (2000). Exploring the phylogenetic structure of ecological communities: an example for rain forest  
493 trees. *The American Naturalist* 156 (2), 145–155.
- 494 Webb, Campbell O. *et al.* (2002). Phylogenies and community ecology. *Annual Review of Ecology and Systematics*  
495 33 (1), 475–505.
- 496 Wiens, John J. *et al.* (2010). Niche conservatism as an emerging principle in ecology and conservation biology. *Ecology*  
497 *Letters* 13 (10), 1310–1324.

## 498 **Data accessibility statement**

499 No new data is released as part of this manuscript. All simulations and analysis R code is released in the supple-  
500 ment.

## 501 Figure legends

502 **Figure 1. Linking clades' evolution and ecological structure.** Here we give an example of how clade-level  
503 variation in ecological structure (the tendency for close/distant relatives to co-occur) might arise. We consider a  
504 set of species that are initially filtered within some biogeographic (or meta-community) context; perhaps the clade  
505 is widespread but not all its members are present in every continent/region, for example. A trait, represented by  
506 the size of the circles at the tips of the phylogeny, evolves across the phylogeny, but evolves faster in one clade  
507 (the red branches) and slower in another (the blue branches). Ecological community assembly on the basis of this  
508 trait, regardless of mechanism, will result in different eco-phylogenetic structures across these clades. Re-framing  
509 our eco-phylogenetic analysis in terms of clades allows for the generation of falsifiable hypotheses about how species'  
510 ecology and evolution interact. In this study, we use evidence of variation in the ecological structure of clades to  
511 test for variation in the evolution of those traits. It would also be possible to find clades with differing evolutionary  
512 patterns, and then use these to test for differing methods of ecological assembly and co-existence within those same  
513 clades. We emphasise that this diagram is but one example of how ecological assembly and the macro-evolution  
514 of species' traits could interact. While we do not show the interaction of fitness and niche differences on species'  
515 co-occurrence (*sensu* Chesson 2000; Mayfield & Levine 2010), we see no reason our approach could not be applied  
516 to more complex models of ecological assembly.

517 **Figure 2. Overview of variance-based partitioning method.** A horizontal dashed line splits the phylogeny  
518 into two clades: one has an overdispersed community phylogenetic structure (close relatives are unlikely to co-occur),  
519 and the other a clustered structure (closed relatives are likely to co-occur). It is these two kinds of ecological structure  
520 that our method aims to detect. A vertical grey dashed line separates species and grouped clade calculations. To  
521 the left of the vertical line, the abundances of each species in two assemblages (A and B) are shown alongside the  
522 variance ( $\sigma^2$ ) of each species' compositions across the assemblages; all species have the same variance ( $1/2$ ). To the  
523 right of the vertical line, community abundances for the species have been summed: the variance of these abundances  
524 is now much lower for the over-dispersed clade and much higher for the clustered clade. For simplicity, we use binary  
525 presence-absence data as an illustration, but this method can be applied to species' abundances within assemblages.  
526 While there is an analytical expectation for clade-level variances (see text) we recommend using ecological null models  
527 to assess the significance of clade-level patterns. Note that when more than two sites are considered, a single variance  
528 value for each species is calculated across all species' presences and absences (or abundances).

529 **Figure 3. Simulations showing how method performance increases with effect size.** In grey, the proba-  
530 bilities are shown for when there was no difference between the model of trait evolution in the focal clade and the  
531 rest of the phylogeny. The mean of these values, along with the percentage of values lying beyond the 2.5% and  
532 97.5% quantiles, are shown in black. In blue, the probabilities for the overdispersed (low variance;  $\sigma_{clade}^2 > \sigma_{tree}^2$ )  
533 are shown, along with a quasi-Binomial GLM prediction. In red, the probabilities for the clustered (high variance;

534  $\sigma_{clade}^2 < \sigma_{tree}^2$ ) are shown, along with a quasi-Binomial GLM prediction. At an  $\alpha_{5\%}$ , a predicted probability of 0.025  
535 or 0.975 would provide statistical support for the focal clade being clustered or overdispersed, respectively. None of  
536 these curves account for the additional explanatory variables used in the models in table 1, and thus these curves  
537 are conservative. Raw data used to parameterise the models shown in table 1.

538 **Figure 4. Empirical mammal results showing associations between ecological structure of clades and**  
539 **their rates of body mass evolution.** To the left and right, the phylogeny of all 483 mammals in the study. Two  
540 large blue circles on the nodes of each phylogeny indicate the two ‘squirrel’ and ‘cavi’ clades tested in the evolutionary  
541 analysis (see text and table 2). The left-hand phylogeny is coloured according to the ranking of the clades’ variances;  
542 a ranking of 1 (blue; see legend) would indicate a clade whose variance was lower than all 1000 null permutations,  
543 and a ranking of 1001 (red; see legend) a clade whose variance was higher than all 1000 null permutations. In the  
544 center, a site-by-species matrix of relative abundance in all 939 assemblages, with a colour-scale indicating relative  
545 abundance (see legend at bottom). The right-hand phylogeny is shaded according to a reconstruction of body mass (g)  
546 across the phylogeny (using `phytools` Revell 2012). Although this reconstruction does not explicitly model variation  
547 in rate among clades, variation in size across its branches can be seen.

## 548 **Figures**



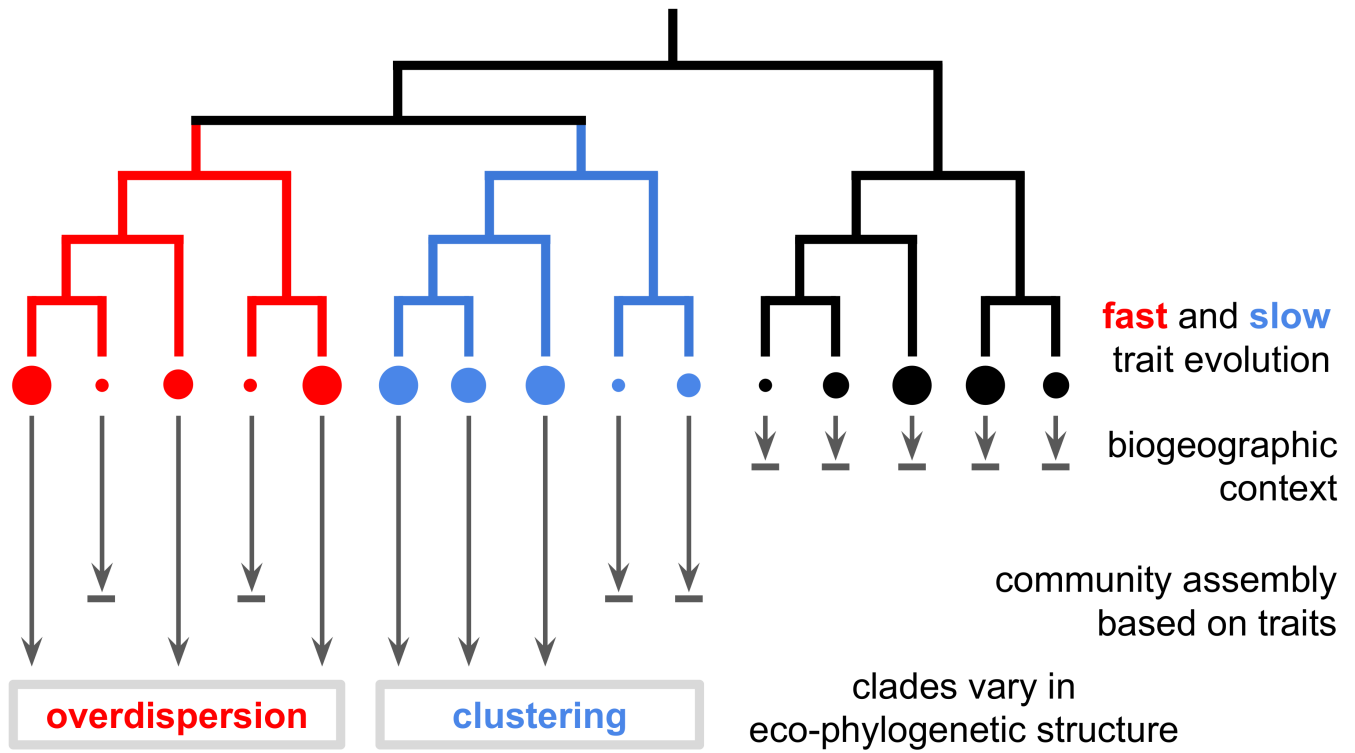

Figure 1

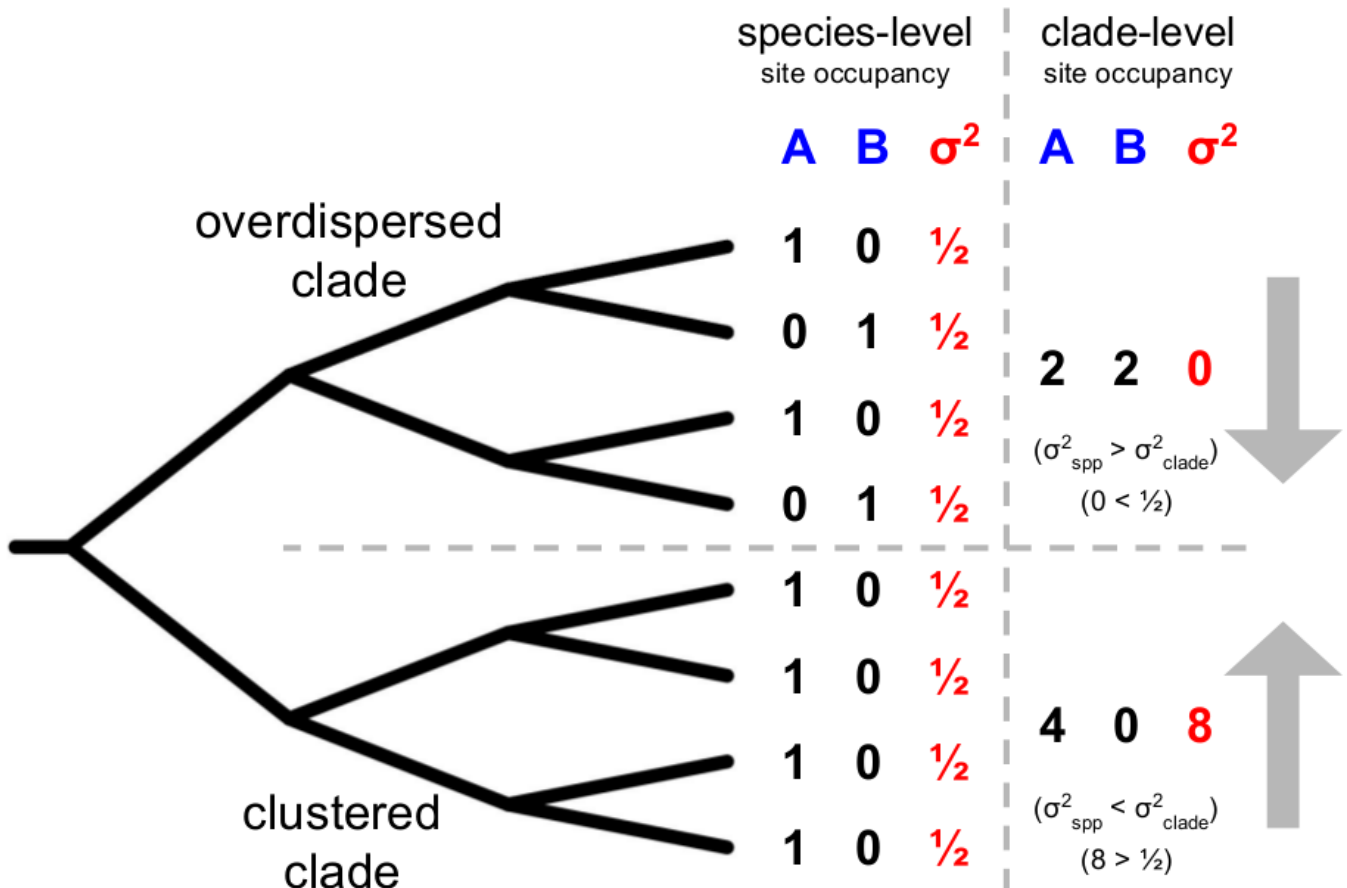

Figure 2

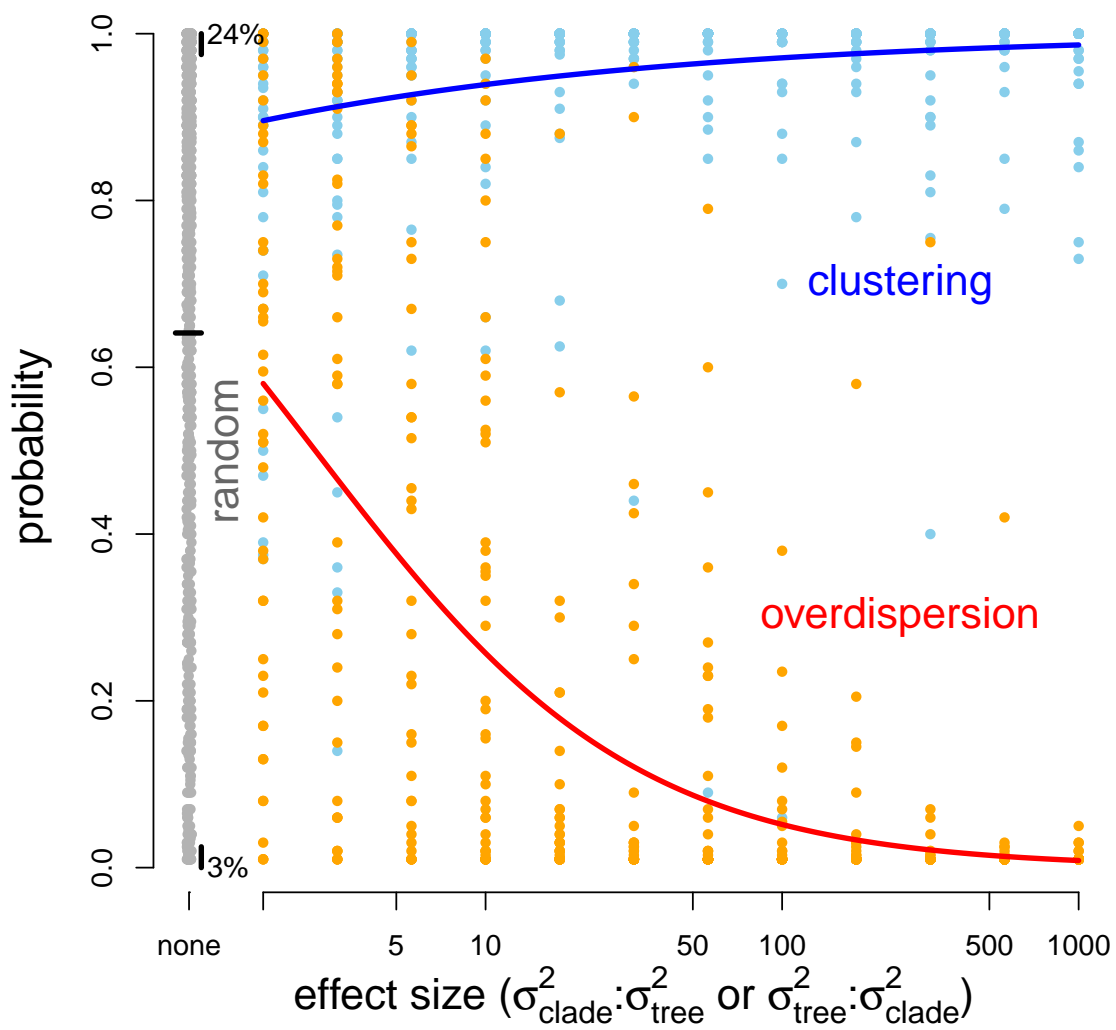

Figure 3

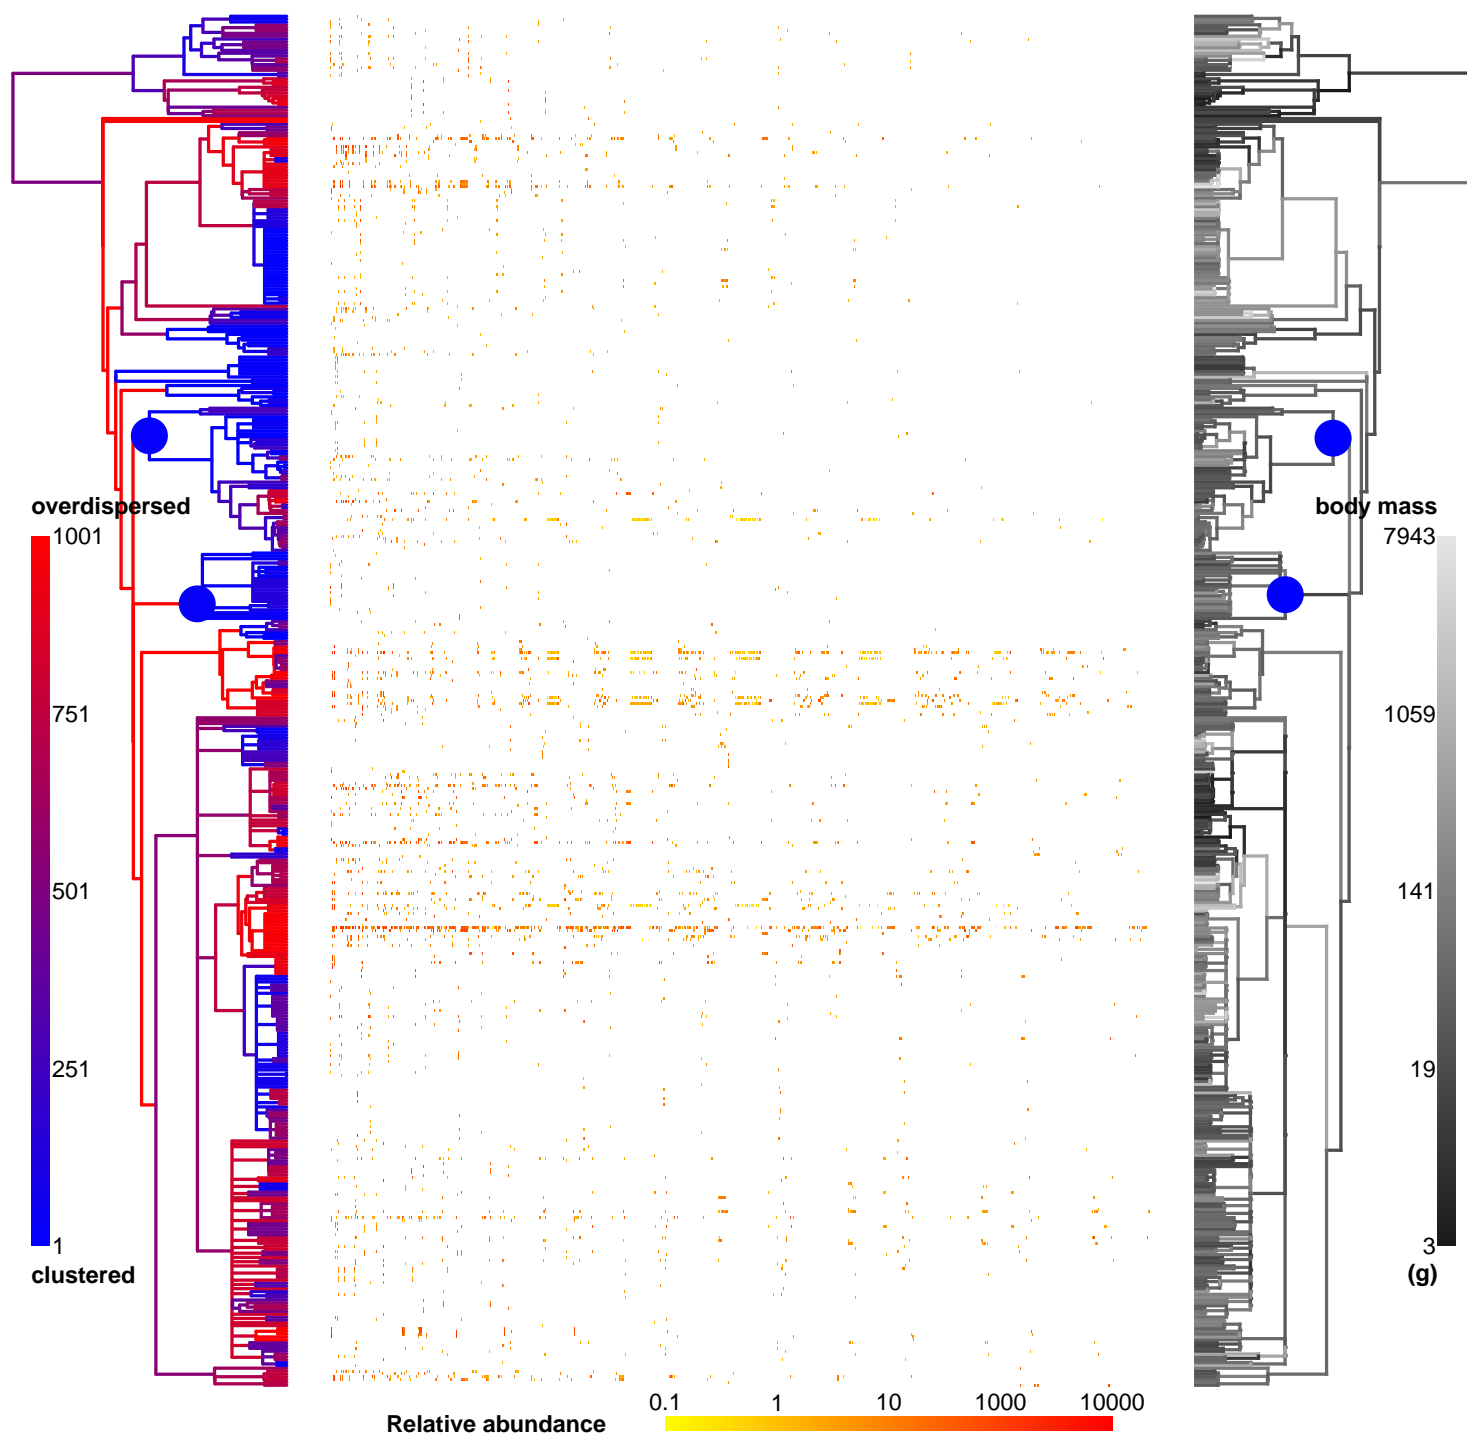

Figure 4

## 549 Tables

|                                                       | Estimate | Std Err | $z$   | $p$        |
|-------------------------------------------------------|----------|---------|-------|------------|
| Intercept ( $n_{spp} = n_{sites} = 50$ )              | -0.0574  | 0.5643  | -0.10 | 0.9191     |
| $\log_{10}(\frac{\sigma_{tree}^2}{\sigma_{clade}^2})$ | 0.8788   | 0.2015  | 4.36  | <0.0001*** |
| $n_{clade}$                                           | 0.3710   | 0.0916  | 4.05  | 0.0001***  |
| $\sigma_{tree}^2$                                     | -0.1703  | 0.2753  | -0.62 | 0.5363     |
| Contrast— $n_{spp} = 100$                             | 0.3772   | 0.5263  | 0.72  | 0.4739     |
| Contrast— $n_{sites} = 100$                           | 0.4182   | 0.3122  | 1.34  | 0.1809     |

(a) Clustering (higher variance)

|                                                       | Estimate | Std Err | $z$    | $p$        |
|-------------------------------------------------------|----------|---------|--------|------------|
| Intercept ( $n_{spp} = n_{sites} = 50$ )              | 1.2188   | 0.2701  | 4.51   | <0.0001*** |
| $\log_{10}(\frac{\sigma_{clade}^2}{\sigma_{tree}^2})$ | -1.8568  | 0.1265  | -14.68 | <0.0001*** |
| $n_{clade}$                                           | 0.0048   | 0.0244  | 0.20   | 0.8437     |
| $\sigma_{tree}^2$                                     | -0.1751  | 0.1399  | -1.25  | 0.2114     |
| Contrast— $n_{spp} = 100$                             | -0.1595  | 0.2007  | -0.79  | 0.4271     |
| Contrast— $n_{sites} = 100$                           | -0.3402  | 0.1569  | -2.17  | 0.0306*    |

(b) Overdispersion (lower variance)

|                                          | Estimate | Std Err | $z$   | $p$        |
|------------------------------------------|----------|---------|-------|------------|
| Intercept ( $n_{spp} = n_{sites} = 50$ ) | 0.6432   | 0.0296  | 21.72 | <0.0001*** |
| $n_{clade}$                              | 0.0174   | 0.0030  | 5.90  | <0.0001*** |
| $\sigma_{tree}^2$                        | -0.0338  | 0.0170  | -1.98 | 0.0478*    |
| Contrast— $n_{spp} = 100$                | -0.0088  | 0.0239  | -0.37 | 0.7123     |
| Contrast— $n_{sites} = 100$              | 0.0222   | 0.0191  | 1.16  | 0.2455     |

(c) Null (no difference in variance)

Table 1: **Simulations showing how method performance varies as a function of phylogeny and clade size, rate of trait evolution, and effect size.** Each sub-table shows the results of modelling the estimated probabilities that focal clades are clustered (higher variance; a), overdispersed (lower variance; b), and random (null, no difference; c) across the simulations. At an  $\alpha_{5\%}$ , a predicted probability of 0.025 or 0.975 would provide statistical support for the focal clade being clustered or overdispersed, respectively. Generalised Linear Models with a quasi-binomial error structure were used to account for non-normality of errors in the clustering (a) and overdispersion (b) models, and so coefficients are reported on the logit scale. In (a), a greater statistical power to detect clustering is most strongly associated with the number of species in the focal clade and the difference in evolutionary rate between the focal clade and the rest of the phylogeny (deviance:  $null_{527} = 98.46$  and  $residual_{522} = 62.52$ ; estimated  $dispersion = 0.51$ ). In (b), a greater statistical power to detect overdispersion is most strongly associated with the difference in evolutionary rate between the focal clade and the rest of the phylogeny and the number of sites sampled (deviance:  $null_{524} = 277.74$  and  $residual_{519} = 152.97$ ; estimated  $dispersion = 0.51$ ). In (c), there is a slight tendency for larger focal clades to appear more clustered, and for faster-evolving traits to drive overdispersion, even when focal clades evolve under the same model as the rest of the phylogeny ( $F_{4,919} = 13.75$ ;  $r^2 = 5.64\%$ ;  $p < 0.0001$ ). We recommend that more attention should be paid to effect estimates than statistical significance in these models, since statistical significance can be driven by sample size and these are the results of simulations.

| $\theta_0$ | $\theta_c$    | $\theta_s$    | $\sigma_0$ | $\sigma_c$ | $\sigma_s$ | $\alpha_0$ | $\alpha_c$ | $\alpha_s$ | $\delta\text{AIC}$ |
|------------|---------------|---------------|------------|------------|------------|------------|------------|------------|--------------------|
| —          | —             | —             | 53         | 32         | 1.12       | —          | —          | —          | 0.00               |
| 2.14±0.42  | 5.38±1.53     | 2.00±1.39     | 52         | 30         | 1.12       | 0.00       | —          | —          | 1.13               |
| 2.14±0.42  | 5.38±720.76   | 2.05±0.52     | 51         | —          | —          | 0.00       | 0.00       | 49         | 1.54               |
| 2.15±0.42  | 352.83±159.69 | -15.44±130.72 | 52         | 30         | 1.1        | 0.00       | 0.00       | 0.00       | 5.00               |
| —          | —             | —             | 58         | —          | —          | —          | —          | —          | 14.90              |
| 2.17±0.44  | —             | —             | 58         | —          | —          | 58         | —          | —          | 16.90              |
| 2.14±0.44  | 5.32±1.70     | 1.96±1.25     | 57         | —          | —          | 57         | —          | —          | 17.00              |

Table 2: **Results of log(body mass) evolutionary modelling.** Above are the  $\theta$  (optimum),  $\sigma$  (rate), and  $\alpha$  (rate of return to optimum) estimates, along with AIC and  $\delta\text{AIC}$  values, for all trait evolutionary models. Each row represents a different model; ‘—’ is used to indicate when a parameter is not fit in a model, and where only a single estimate for a parameter is given (*e.g.*,  $\theta_0$ ) only a single parameter was fit across the whole phylogeny. Thus rows one and four represent Brownian motion (models with no optima), and all other rows are variants of Ornstein-Uhlenbeck models. In subscripts of parameters, ‘c’ refers to the ‘capi’ clade, ‘s’ to the ‘squirrel’ clade, and ‘0’ to the remainder of the phylogeny. See text and figure 4 for a description of these species making up each clade. The  $\alpha$  and  $\sigma$  estimates have been multiplied by  $10^{-4}$  for brevity of presentation. The four most likely models according to  $\delta\text{AIC}$  all contain clade-level variation, strongly supporting different patterns of evolution in the clades highlighted by the clade-level partitioning of  $\beta$ -diversity(see text).
